# Supplementary material
Source: publisher figshare collection journal article supplement (https://asha.figshare.com/articles/dataset/_/22630726)

**Supplemental Material S2.** Sample pictures for target sentences.

1. The sheep is a nurse.

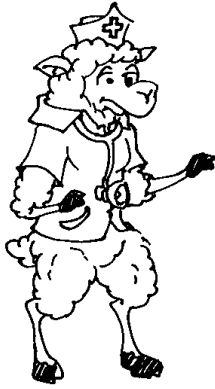

2. The queen is itchy.

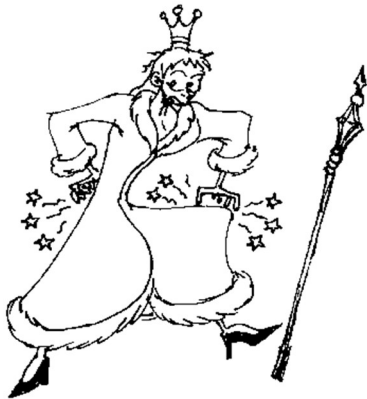

Supplement: Supplementary file 1 [file 1]
