# Supplementary material
Source: publisher figshare collection journal article supplement (https://asha.figshare.com/articles/dataset/_/22630726)
Supplement: Supplementary file 2 [file 1]

## **Supplemental Material S1. Contrastive and target sentences.**

### **Contrastive sentences**

#### *Nominal Predicates*

1. The women are nurses.
2. The ducks are students.
3. The bunnies are girls.
4. The lions are queens.
5. The monkeys are boys.
6. The cows are princesses.
7. The birds are policemen.
8. The mice are doctors.
9. The alligators are princes.
10. The lions are kings.

#### *Permanent-adjectival Predicates*

11. The chickens are very small.
12. The boys are ugly.
13. The crabs are red.
14. The cars are short.
15. The bunnies are pink.
16. The sharks are ugly.
17. The elephants are very fat.
18. The butterflies are pretty.
19. The alligators are huge.
20. The penguins are very short.

#### *Locative Predicates*

21. The turtles are inside.
22. The kids are outside.
23. The wolves are outside
24. The rabbits are over there.
25. The chickens are over here.
26. The penguins are over here.
27. The foxes are inside.
28. The squirrels are outside.
29. The zebras are outside.
30. The butterflies are over there.

### **Target Sentences**

1. The man is a doctor.
2. The bear is a teacher.
3. The pig is a boy.
4. The dog is a king.
5. The cat is a girl.
6. The frog is a prince.
7. The deer is a fireman.
8. The sheep is a nurse.
9. The lamb is princess.
10. The ant is a queen.
11. The bear is very big.
12. The girl is pretty.
13. The duck is yellow.
14. The train is very long.
15. The dog is white.
16. The deer is beautiful.
17. The ant is very thin.
18. The worm is ugly.
19. The frog is tiny.
20. The sheep is very tall.
21. The dog is outside.
22. The man is inside.
23. The bear is inside
24. The cat is over here.
25. The pig is over there.
26. The sheep is over there.
27. The deer is outside.
28. The frog is inside.
29. The ant is inside.
30. The worm is over here.

*Temporary-adjectival Predicates*

- |                              |                            |
|------------------------------|----------------------------|
| 31. The kids are very happy. | 31. The man is very mad.   |
| 32. The mice are sad.        | 32. The duck is happy.     |
| 33. The boys are very hot.   | 33. The girl is very cold. |
| 34. The mice are very cold.  | 34. The dog is very hot.   |
| 35. The tigers are fine.     | 35. The bear is hurt.      |
| 36. The dinosaurs are happy. | 36. The deer is grumpy.    |
| 37. The chickens are noisy.  | 37. The sheep is quiet.    |
| 38. The kings are fine.      | 38. The queen is itchy.    |
| 39. The lions are quiet.     | 39. The frog is noisy.     |
| 40. The shirts are very dry. | 40. The sock is very wet.  |

*Mean (SDs) of Descriptive Measures of Target Sentences*

| Predicate Types      | Sentence Length | Subject Frequency | Predicate Frequency |
|----------------------|-----------------|-------------------|---------------------|
| Nominal              | 4.30 (0.48)     | 1.69 (1.00)       | 1.47 (0.81)         |
| Permanent-adjectival | 4.40 (0.70)     | 1.77 (0.80)       | 1.53 (0.77)         |
| Locative             | 4.40 (0.52)     | 1.82 (0.82)       | 2.48 (0.65)         |
| Temporary-adjectival | 4.30 (0.67)     | 1.85 (0.85)       | 1.22 (0.82)         |

*Note.* Sentence length is computed in syllables. Subject/predicate frequency refers to the log frequency of subject/predicate words
